# Supplementary material
Source: publisher site journal article supplement (https://www.spandidos-publications.com/2033/downloadSupplementary)

Figure S1. Detection of VDR mRNA expression in PTC tissue and healthy tissue from Gene Expression Omnibus datasets. Comparison of VDR expression between PTC tissue and healthy tissue in (A) GSE33630, (B) GSE27155, (C) GSE3467 and (D) GSE3678 datasets. Ctrl, control; PTC, papillary thyroid cancer; VDR, vitamin D receptor.

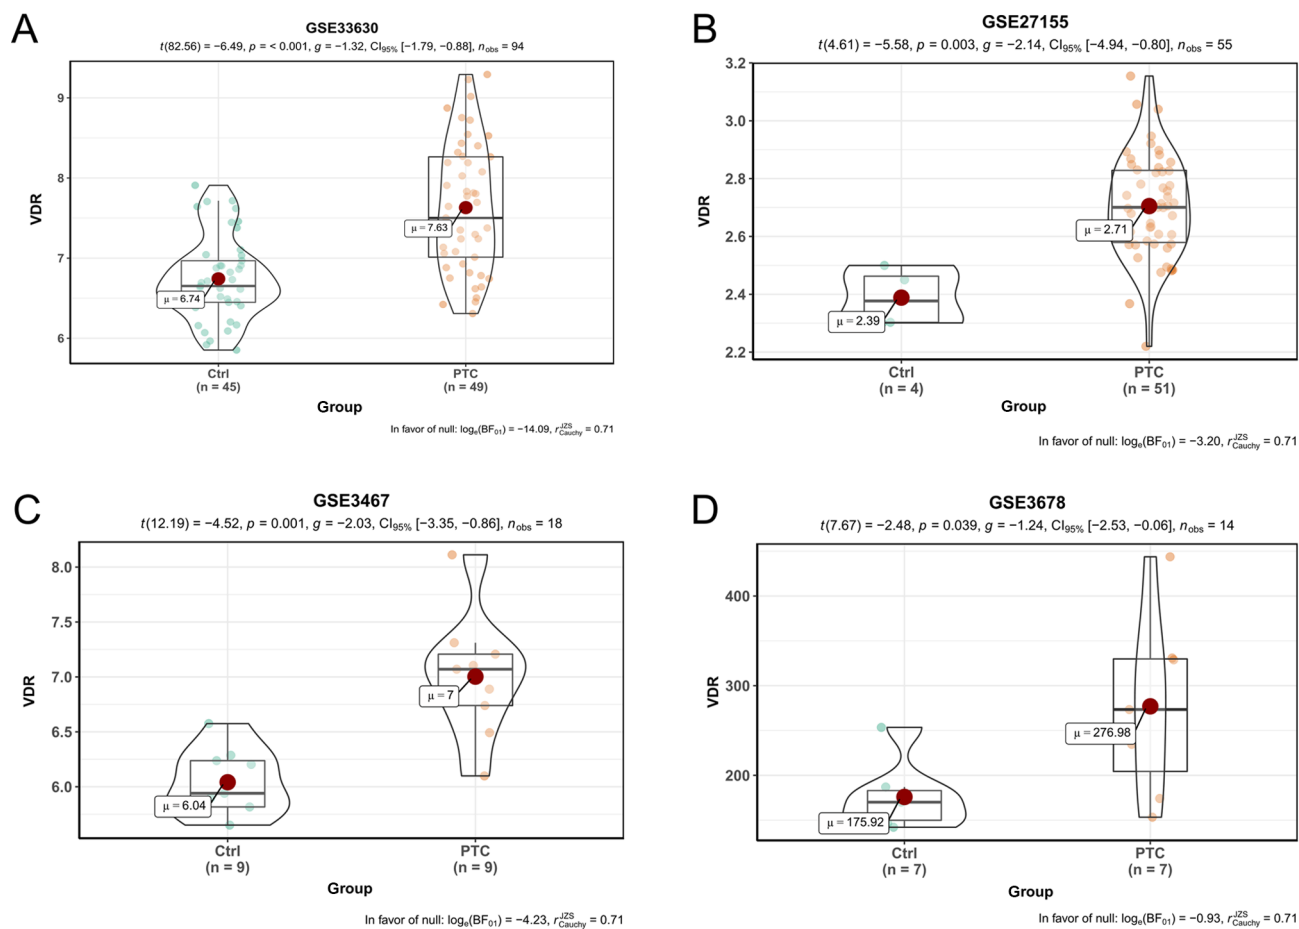

Supplement: Supplementary file 1 [file downloadSupplementary]
